# Supplementary material for: The Conserved and Specific Roles of the LUX ARRHYTHMO in Circadian Clock and Nodulation
Source: MDPI journal article supplement (doi:10.3390/ijms23073473), 2022-03-23
Supplement: s1 [file s1]

## Supporting Informations

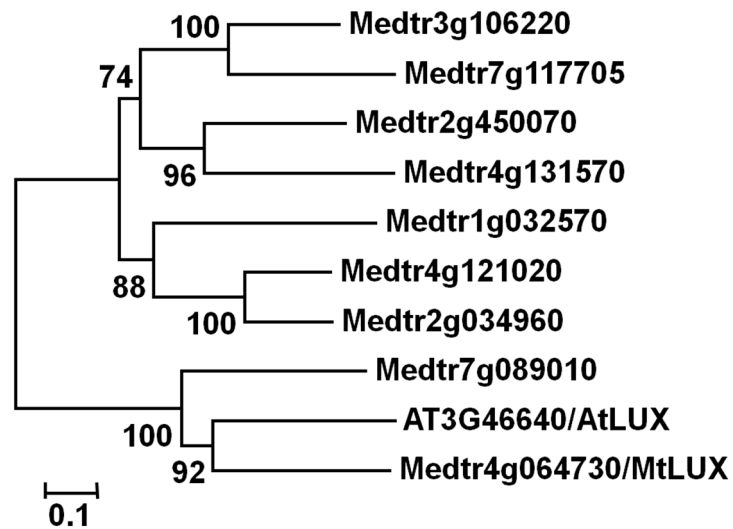

**Figure S1** | Phylogenetic analysis of AtLUX protein and MtLUX like proteins from *M. truncatula*. The most strongly related *M. truncatula* protein to AtLUX is the product of *Mt4g064730* (*MtLUX*). Bootstrap value supporting each node is shown.

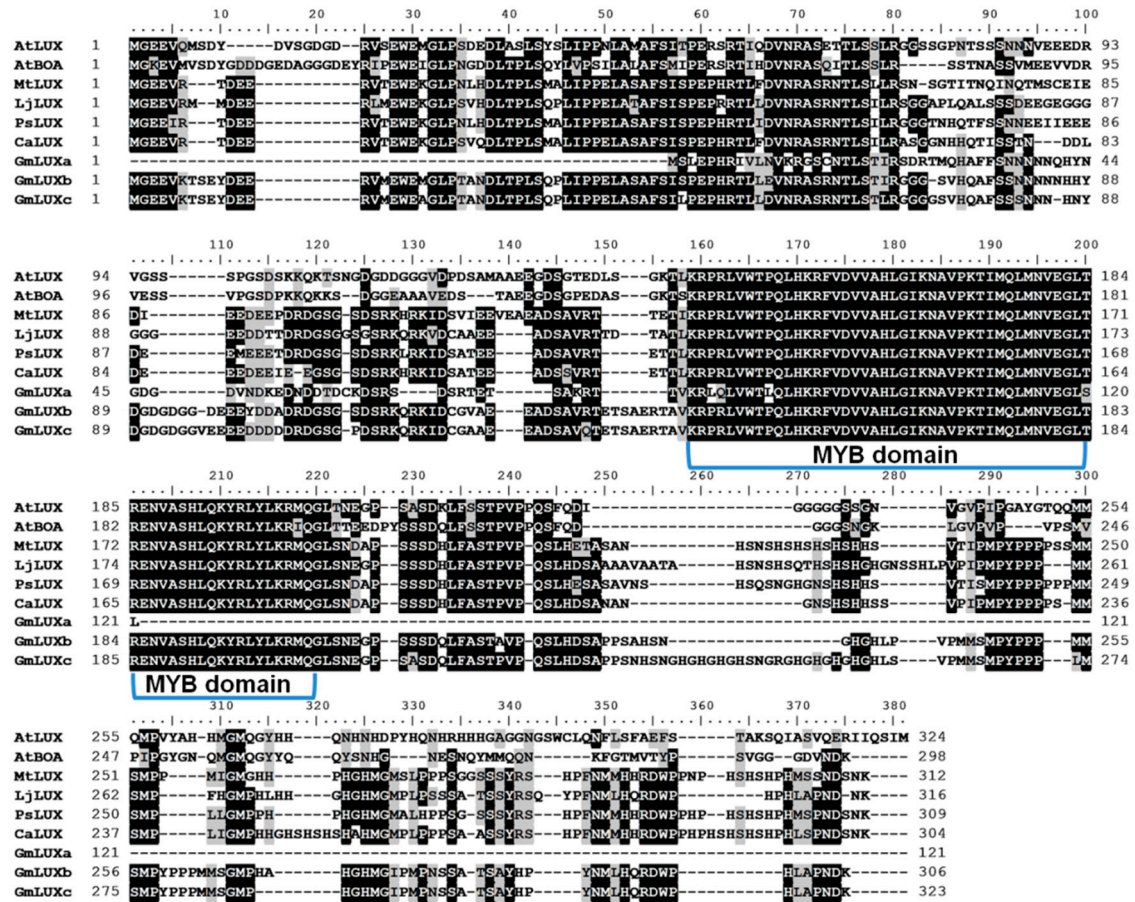

Figure S2 | Amino acids alignment for LUX-Like proteins.

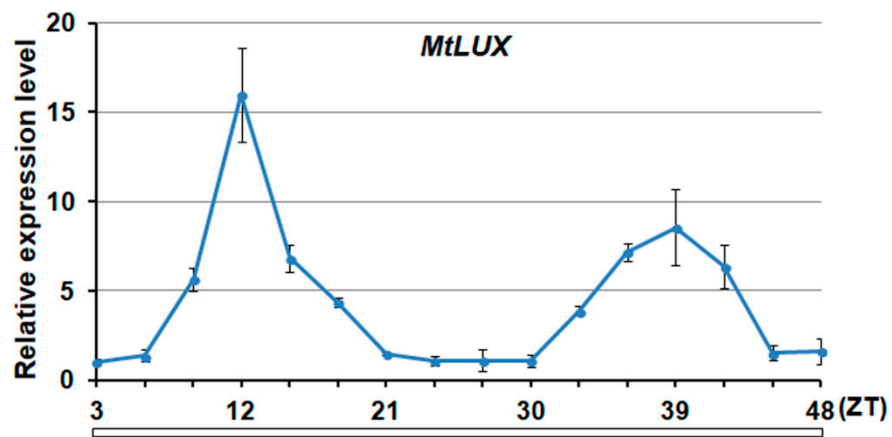

**Figure S3** | The expression pattern of *MtLUX* in the leaves of 4-week-old WT under constant light condition. Values shown as means  $\pm$  SD of three biological replicates. *MtUBIQUITIN* was used as the internal control. White bar at the bottom indicates period of constant light.

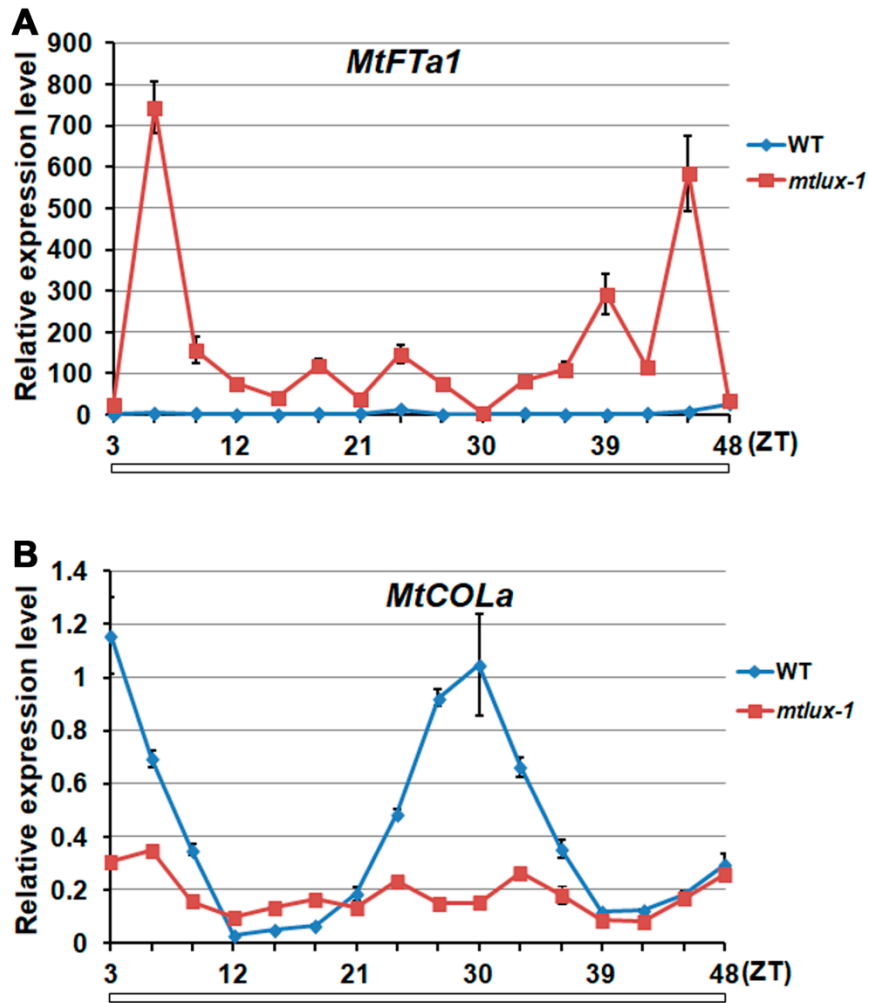

**Figure S4** | The expression pattern of *MtFTa1* (A) and *MtCOLa* (B) in the leaves of 4-week-old WT under constant light condition. Values shown as means  $\pm$  SD of three biological replicates. *MtUBIQUITIN* was used as the internal control. White bars at the bottom indicate periods of constant light.

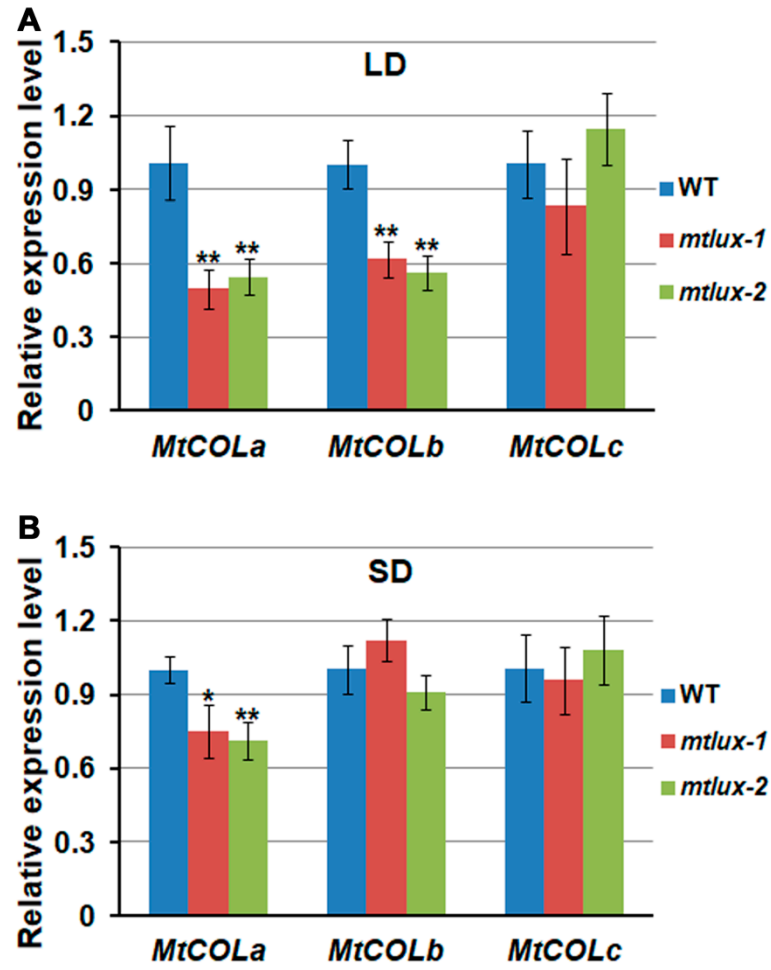

**Figure S5** | Relative gene expression of three *Medicago* COL genes in long day (A) and short day (B) conditions in WT and *mtlux* mutant plants. Values shown as means  $\pm$  SD of three biological replicates. \*, \*\*: means differ significantly ( $P < 0.05$ ,  $P < 0.01$ ).

### Statistic of Differentially Expressed Genes

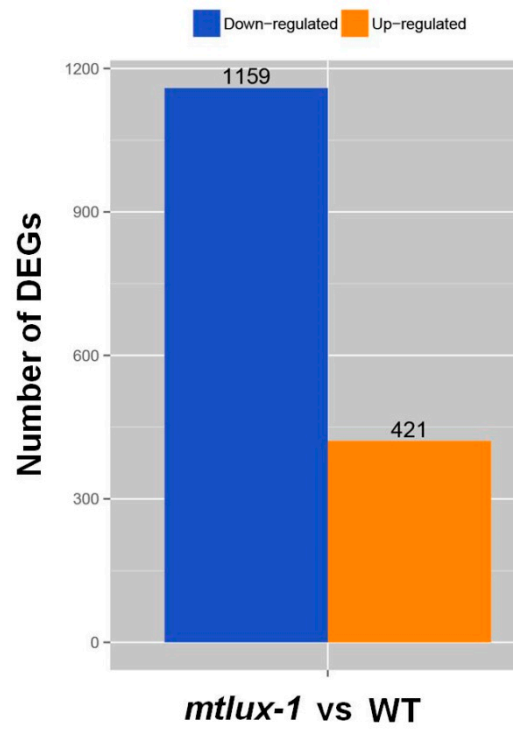

**Figure S6** | Differentially expressed genes (DEGs) between *mtlux-1* and wild type.

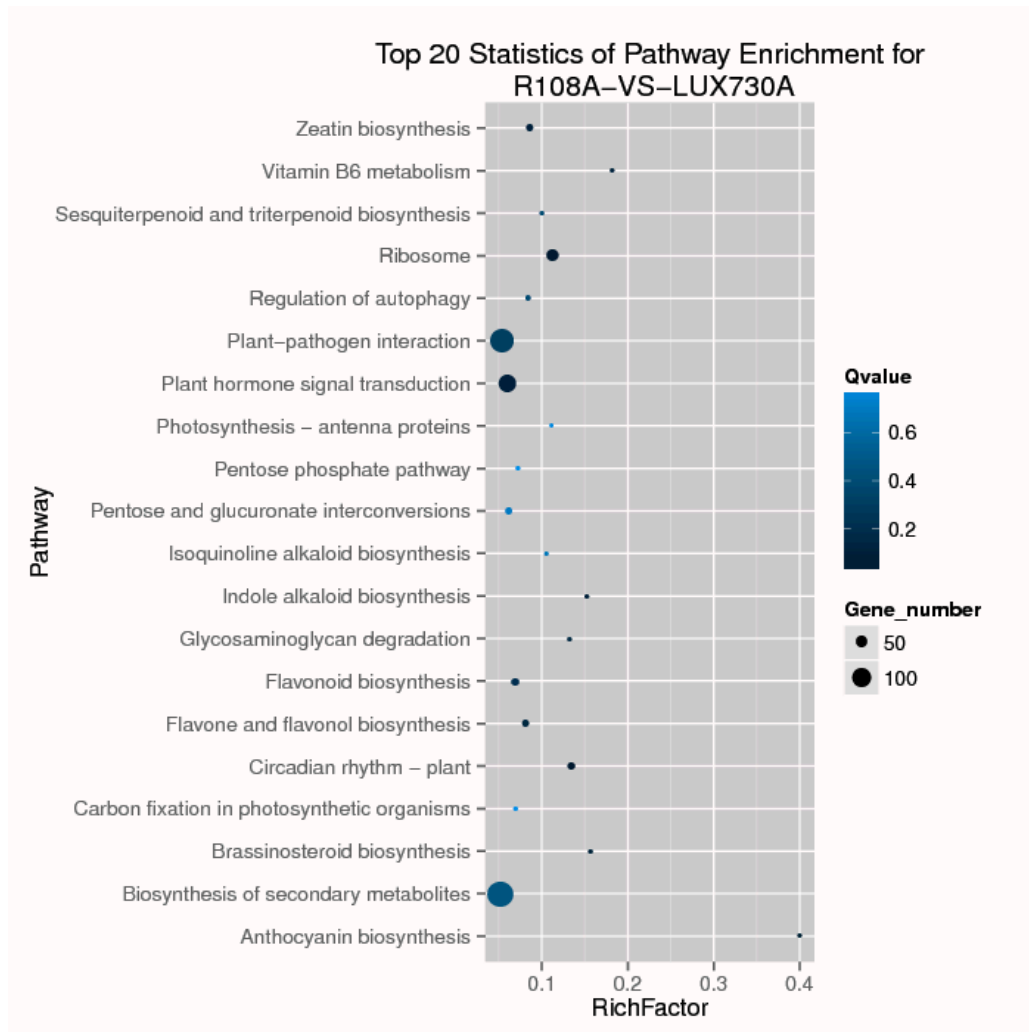

**Figure S7** | Functional assignment of the differentially expressed genes (DEGs) by Gene Ontology (GO) analysis of top20 pathways. R108A as the wild type and LUX730A as the *mtlux-1* mutant. Scale represents *q* value.

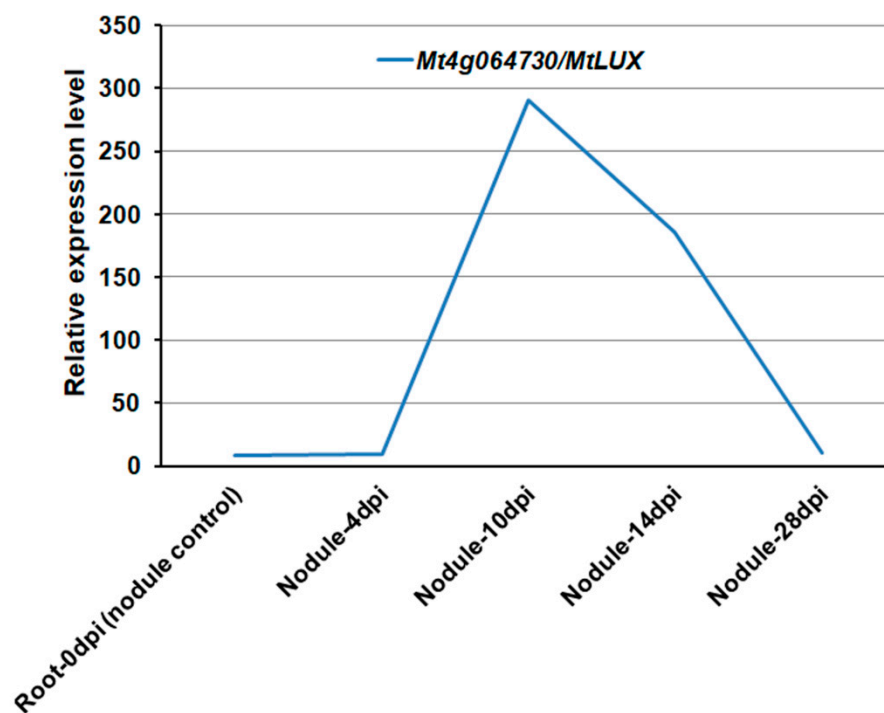

**Figure S8** | Transcriptional profile of *MtLUX* in nodule. The transcriptional profile of *MtLUX* derived from the *M. truncatula* Gene Expression Atlas (<https://mtgea.noble.org/v2/>). The microarray probe set used is Mtr.32211.1.S1\_at.
