# Supplementary material for: The Conserved and Specific Roles of the LUX ARRHYTHMO in Circadian Clock and Nodulation
Source: Int J Mol Sci. 2022 Mar 23;23(7):3473. doi: 10.3390/ijms23073473 (PMC8998424; doi:10.3390/ijms23073473)
Supplement: Supplementary file 1 [file ijms-23-03473-s001.zip › supplementary Tables.xlsx]

## Sheet: Table S1
Supplementary Table S1 Primers used in this study
Primer name	Primer sequence	Application
MtLUX-CDS-F	ATGGGTGAAGAGGTTCGAACAGACGAAGAA	For cloning the CDS of MtLUX gene
MtLUX-CDS-R	TTTATTACTATCATTAGAAGACATATGAGG
MtLUX-qRT-F	GCTTCCGCTTTCAGCATCTC	For qRT-PCR analysis of gene expression
MtLUX-qRT-R	GAGGCACGGTTAACGTCGAA
MtCOLa-qRT-F	GGTTGTGAGGTGGAGGAAGA
MtCOLa-qRT-R	CAACAAAAGCCATGAAGCTG
MtCOLb-qRT-F	CCGAACACGAACATGAACAC
MtCOLb-qRT-R	CATCCATCGACGGTGAAGA
MtCOLc-qRT-F	ATCTTCCTCGATGGACGTTG
MtCOLc-qRT-R	GTCCCGTAACCACAGTTTGA
MtFTa1-qRT-F	GTAGCAGTAGGAATCCACTAGC
MtFTa1-qRT-R	ACACTCACTCTCGGTTGATTTCC
MtLHY-qRT-F	TTGCCTTTCGGGCTCTATTCT
MtLHY-qRT-R	CAAATCATGAGGAGGTGAAAAGC
MtTOC1a-qRT-F	CAAGAGACAGGAATATCAGTCCAACA
MtTOC1a-qRT-R	GGTTCCTCAACAGAAGCAGCAT
MtPRR5/9-qRT-F	TGCGGAAGCATATCCAAGTG
MtPRR5/9-qRT-R	GATCACAGCCTGGCCTAAATG
MtPRR7-qRT-F	CCTTAAGGTCTTGCTTGTGGAGTAT
MtPRR7-qRT-R	GCGAAGCAATGCAGTGACA
MtGI-qRT-F	CCCGTTACACTACACGGATCATC
MtGI-qRT-R	GTATGGCGGACTGCCGAAT
MtCCR2a-qRT-F	AATCCATGAACGATGCCATTG
MtCCR2a-qRT-R	CAGTGATGTTACGTCCGTCCAA
MtUBI-qRT-F	CTGACAGCCCACTGAATTGTGA	For qRT-PCR analysis as a control
MtUBI-qRT-R	TTTTGGCATTGCTGCAAGC
Tnt1-Reverse-R	TCCTTGTTGGATTGGTAGCCAACTTTGTTG	Genotyping
LTR5-R	GCCAAAGCTTCACCCTCTAAAGCCT
LUX-F	CTTCCGCTTTCAGCATCTC
LUX-R	TCCCAAGATGAGCAACAACA

## Sheet: Table S2
Supplementary Table S2 Differentially Expressed Genes（DEGs）of Photosynthesis-antenna Proteins and Photosynthesis in the Leaves of mtlux-1 Mutant Compared to Wild Type.
geneID	geneLength	log2 Ratio(LUX730A/R108A)	Up-Down-Regulation(LUX730A/R108A)	FDR	Description	KEGG Orthology	GO Component	GO Function	GO Process	Blast nr
Medtr6g011880	798	1.34525	Up	0	light-harvesting complex I chlorophyll A/B-binding protein	K08912|1|3e-140|495|mtr:MTR_6g012110|light-harvesting complex II chlorophyll a/b binding protein 1	GO:0009521;GO:0031224//intrinsic to membrane;GO:0009534//chloroplast thylakoid	GO:0046906//tetrapyrrole binding;GO:0043169//cation binding	GO:0006464//cellular protein modification process;GO:0006091//generation of precursor metabolites and energy	gi|388503040|gb|AFK39586.1|/7.23571e-145/unknown [Medicago truncatula]
Medtr6g012110	798	1.02581	Up	1.78676e-215	light-harvesting complex I chlorophyll A/B-binding protein	K08912|1|4e-142|501|mtr:MTR_6g012110|light-harvesting complex II chlorophyll a/b binding protein 1	GO:0009521;GO:0031224//intrinsic to membrane;GO:0009534//chloroplast thylakoid	GO:0046906//tetrapyrrole binding;GO:0043169//cation binding	GO:0006464//cellular protein modification process;GO:0006091//generation of precursor metabolites and energy	gi|357496387|ref|XP_003618482.1|/4.85344e-141/Chlorophyll a/b-binding protein [Medicago truncatula]
Medtr6g074140	315	-12.8118	Down	0.000298783	chlorophyll A/B-binding protein, putative	K08910|1|9e-25|109|aly:ARALYDRAFT_485112|light-harvesting complex I chlorophyll a/b binding protein 4	GO:0009526//plastid envelope;GO:0043234//protein complex;GO:0034357;GO:0009570//chloroplast stroma;GO:0009534//chloroplast thylakoid;GO:0044425//membrane part	GO:0046906//tetrapyrrole binding	GO:0009628//response to abiotic stimulus;GO:0044237//cellular metabolic process	gi|357499461|ref|XP_003620019.1|/8.85941e-55/Chlorophyll a /b binding protein [Medicago truncatula]
Medtr7g021780	1797	6.10852	Up	2.24476e-07	F0F1-type ATP synthase, beta subunit	K02112|1|0.0|947|mtr:MetrCp073|F-type H+-transporting ATPase subunit beta [EC:3.6.3.14]	GO:0009534//chloroplast thylakoid;GO:0033178//proton-transporting two-sector ATPase complex, catalytic domain	GO:0015078//hydrogen ion transmembrane transporter activity;GO:0015662//ATPase activity, coupled to transmembrane movement of ions, phosphorylative mechanism;GO:0019829//cation-transporting ATPase activity;GO:0032559	GO:0015986//ATP synthesis coupled proton transport;GO:0015988//energy coupled proton transmembrane transport, against electrochemical gradient	gi|357502813|ref|XP_003621695.1|/0/ATP synthase subunit beta [Medicago truncatula]
Medtr1g104630	582	1.55582	Up	4.73482e-09	photosystem I reaction center subunit II	K02692|1|3e-77|285|gmx:100800992|photosystem I subunit II	GO:0009507//chloroplast;GO:0009522//photosystem I	-	-	gi|357444261|ref|XP_003592408.1|/2.38164e-102/Photosystem I reaction center subunit II [Medicago truncatula]
Medtr1g086380	894	-1.29071	Down	2.39708e-08	photosystem II Q(B) protein	K02703|1|8e-158|554|mtr:MTR_4g051290|photosystem II P680 reaction center D1 protein	GO:0009521;GO:0031224//intrinsic to membrane;GO:0009534//chloroplast thylakoid;GO:0042716	GO:0046914//transition metal ion binding;GO:0009055//electron carrier activity	GO:0051234//establishment of localization;GO:0006950//response to stress;GO:0009767//photosynthetic electron transport chain	gi|357442131|ref|XP_003591343.1|/1.73939e-161/Photosystem Q(B) protein [Medicago truncatula]
Medtr2g089580	372	-1.28768	Down	0.000210314	photosystem II reaction center protein	K02703|1|2e-57|218|mtr:MTR_4g051290|photosystem II P680 reaction center D1 protein	GO:0031224//intrinsic to membrane;GO:0009521;GO:0009526//plastid envelope;GO:0009534//chloroplast thylakoid;GO:0042716	GO:0046914//transition metal ion binding;GO:0009055//electron carrier activity	GO:0009767//photosynthetic electron transport chain;GO:0051234//establishment of localization;GO:0006950//response to stress	gi|357453623|ref|XP_003597092.1|/1.41264e-68/Photosystem Q(B) protein [Medicago truncatula]
Medtr4g051290	1062	-1.07792	Down	1.83203e-29	photosystem II Q(B) protein	K02703|1|0.0|691|mtr:MTR_4g051290|photosystem II P680 reaction center D1 protein	GO:0009521;GO:0031224//intrinsic to membrane;GO:0009534//chloroplast thylakoid;GO:0042716	GO:0046914//transition metal ion binding;GO:0009055//electron carrier activity	GO:0051234//establishment of localization;GO:0006950//response to stress;GO:0009767//photosynthetic electron transport chain	gi|153012231|ref|YP_001381746.1|/0/photosystem II protein D1 [Medicago truncatula]

## Sheet: Table S3
Supplementary Table S3 Differentially Expressed Genes（DEGs）of Carbon Fixation in Photosynthetic Organisms in the Leaves of mtlux-1 Mutant Compared to Wild Type.
geneID	geneLength	log2 Ratio(LUX730A/R108A)	Up-Down-Regulation(LUX730A/R108A)	FDR	Description	KEGG Orthology	GO Component	GO Function	GO Process	Blast nr
Medtr5g030620	1977	11.5603	Up	4.51344e-12	phosphoenolpyruvate carboxykinase [ATP] protein	K01610|1|0.0|1228|mtr:MTR_5g030620|phosphoenolpyruvate carboxykinase (ATP) [EC:4.1.1.49]	GO:0031981//nuclear lumen;GO:0044444//cytoplasmic part	GO:0016772//transferase activity, transferring phosphorus-containing groups;GO:0004611//phosphoenolpyruvate carboxykinase activity;GO:0032559	GO:0010038//response to metal ion;GO:0009267//cellular response to starvation;GO:0006796//phosphate-containing compound metabolic process;GO:0006006//glucose metabolic process;GO:0050832//defense response to fungus	gi|357485279|ref|XP_003612927.1|/0/Phosphoenolpyruvate carboxykinase [Medicago truncatula]
Medtr1g087030	396	1.35302	Up	2.4911e-289	calvin cycle protein CP12-1	K05298|1|5e-06|47.8|bdi:100829538|glyceraldehyde-3-phosphate dehydrogenase (NADP+) (phosphorylating) [EC:1.2.1.13]	-	-	-	gi|357442247|ref|XP_003591401.1|/4.41086e-70/Calvin cycle protein CP12 [Medicago truncatula]
Medtr2g092930	2901	1.06065	Up	3.24913e-81	phosphoenolpyruvate carboxylase	K01595|1|0.0|1907|mtr:MTR_2g092930|phosphoenolpyruvate carboxylase [EC:4.1.1.31]	-	GO:0046872//metal ion binding;GO:0004611//phosphoenolpyruvate carboxykinase activity;GO:0016628//oxidoreductase activity, acting on the CH-CH group of donors, NAD or NADP as acceptor	GO:0071704;GO:0009060//aerobic respiration;GO:0043648//dicarboxylic acid metabolic process	gi|357453687|ref|XP_003597124.1|/0/Phosphoenolpyruvate carboxylase [Medicago truncatula]
Medtr7g114900	843	1.05288	Up	0	ribose-5-phosphate isomerase A	K01807|1|6e-139|491|mtr:MTR_7g114900|ribose 5-phosphate isomerase A [EC:5.3.1.6]	GO:0043231//intracellular membrane-bounded organelle;GO:0043231//intracellular membrane-bounded organelle	GO:0016861//intramolecular oxidoreductase activity, interconverting aldoses and ketoses;GO:0016861//intramolecular oxidoreductase activity, interconverting aldoses and ketoses	GO:0006098//pentose-phosphate shunt;GO:0006098//pentose-phosphate shunt	gi|357512271|ref|XP_003626424.1|/7.16833e-138/Chloroplast ribose-5-phosphate isomerase [Medicago truncatula]
Medtr7g007230	546	1.05142	Up	0	ribulose bisphosphate carboxylase small chain	K01602|1|1e-79|293|mtr:MTR_6g018310|ribulose-bisphosphate carboxylase small chain [EC:4.1.1.39]	GO:0009536//plastid	GO:0016491//oxidoreductase activity;GO:0016831//carboxy-lyase activity	GO:0043094;GO:0015977//carbon fixation	gi|358345814|ref|XP_003636970.1|/5.04874e-93/Ribulose bisphosphate carboxylase small chain 3A [Medicago truncatula]
Medtr4g071880	1161	-1.59853	Down	1.90072e-241	fructose-bisphosphate aldolase class I	K01623|1|0.0|677|mtr:MTR_4g071860|fructose-bisphosphate aldolase, class I [EC:4.1.2.13]	-	GO:0016832//aldehyde-lyase activity	GO:0006007//glucose catabolic process	gi|357473567|ref|XP_003607068.1|/0/Fructose-bisphosphate aldolase [Medicago truncatula]
Medtr5g430730	1977	-1.49461	Down	5.07886e-09	phosphoenolpyruvate carboxykinase [ATP] protein	K01610|1|0.0|1228|mtr:MTR_5g030620|phosphoenolpyruvate carboxykinase (ATP) [EC:4.1.1.49]	GO:0031981//nuclear lumen;GO:0044444//cytoplasmic part	GO:0016772//transferase activity, transferring phosphorus-containing groups;GO:0004611//phosphoenolpyruvate carboxykinase activity;GO:0032559	GO:0010038//response to metal ion;GO:0009267//cellular response to starvation;GO:0006796//phosphate-containing compound metabolic process;GO:0006006//glucose metabolic process;GO:0050832//defense response to fungus	gi|357485279|ref|XP_003612927.1|/0/Phosphoenolpyruvate carboxykinase [Medicago truncatula]
Medtr2g101040	2022.45	-1.26233	Down	2.72697e-132	NADP-dependent malic enzyme-like protein	K00029|1|0.0|983|gmx:100791514|malate dehydrogenase (oxaloacetate-decarboxylating)(NADP+) [EC:1.1.1.40]	GO:0009536//plastid;GO:0009536//plastid;GO:0009536//plastid;GO:0009536//plastid	GO:0016615//malate dehydrogenase activity;GO:0000166//nucleotide binding;GO:0043169//cation binding;GO:0016651//oxidoreductase activity, acting on NAD(P)H;GO:0046914//transition metal ion binding;GO:0042802//identical protein binding;GO:0004470//malic enzyme activity;GO:0000166//nucleotide binding;GO:0016651//oxidoreductase activity, acting on NAD(P)H;GO:0046914//transition metal ion binding;GO:0…	GO:0043648//dicarboxylic acid metabolic process;GO:0006631//fatty acid metabolic process;GO:0043648//dicarboxylic acid metabolic process;GO:0051260//protein homooligomerization;GO:0006631//fatty acid metabolic process;GO:0043648//dicarboxylic acid metabolic process;GO:0051260//protein homooligomerization;GO:0006631//fatty acid metabolic process;GO:0043648//dicarboxylic acid metabolic process;GO:0…	gi|356556489|ref|XP_003546557.1|/0/PREDICTED: NADP-dependent malic enzyme, chloroplastic-like [Glycine max]

## Sheet: Table S4
Supplementary Table S4 Differentially Expressed Genes（DEGs）of Starch and Sucrose Metabolism in the Leaves of mtlux-1 Mutant Compared to Wild Type.
geneID	geneLength	log2 Ratio(LUX730A/R108A)	Up-Down-Regulation(LUX730A/R108A)	FDR	Description	KEGG Orthology	GO Component	GO Function	GO Process	Blast nr
Medtr5g013620	1632	2.83629	Up	6.29617e-108	beta-amylase	K01177|1|0.0|1022|mtr:MTR_5g013640|beta-amylase [EC:3.2.1.2]	GO:0009532//plastid stroma	GO:0016160//amylase activity;GO:0043167//ion binding	GO:0005982//starch metabolic process;GO:0006950//response to stress;GO:0000023//maltose metabolic process	gi|357482245|ref|XP_003611408.1|/0/Beta-amylase [Medicago truncatula]
Medtr5g013640	1632	2.21573	Up	1.50314e-14	beta-amylase	K01177|1|0.0|1113|mtr:MTR_5g013640|beta-amylase [EC:3.2.1.2]	GO:0009532//plastid stroma	GO:0016160//amylase activity;GO:0043167//ion binding	GO:0005982//starch metabolic process;GO:0006950//response to stress;GO:0000023//maltose metabolic process	gi|357482247|ref|XP_003611409.1|/0/Beta-amylase [Medicago truncatula]
Medtr4g035870	594	2.15206	Up	2.28978e-40	plant invertase/pectin methylesterase inhibitor	K01051|1|2e-19|93.6|aly:ARALYDRAFT_892433|pectinesterase [EC:3.1.1.11];K02355|4|2e-18|90.1|vvi:100257414|elongation factor G	-	-	-	gi|388494382|gb|AFK35257.1|/8.08344e-93/unknown [Medicago truncatula]
Medtr4g035880	594	2.06096	Up	4.15967e-06	plant invertase/pectin methylesterase inhibitor	K01051|1|2e-19|93.6|aly:ARALYDRAFT_478847|pectinesterase [EC:3.1.1.11]	-	-	-	gi|388494382|gb|AFK35257.1|/9.20584e-105/unknown [Medicago truncatula]
Medtr3g462340	2523	1.86361	Up	1.87796e-265	glycogen/starch/alpha-glucan phosphorylase family protein	K00688|1|0.0|1540|gmx:100789789|starch phosphorylase [EC:2.4.1.1]	GO:0009536//plastid;GO:0009536//plastid;GO:0009536//plastid	GO:0048037//cofactor binding;GO:0016758//transferase activity, transferring hexosyl groups;GO:0048037//cofactor binding;GO:0016758//transferase activity, transferring hexosyl groups;GO:0048037//cofactor binding;GO:0016758//transferase activity, transferring hexosyl groups	GO:0006950//response to stress;GO:0044238//primary metabolic process;GO:0010038//response to metal ion;GO:0006950//response to stress;GO:0044238//primary metabolic process;GO:0010038//response to metal ion;GO:0006950//response to stress;GO:0044238//primary metabolic process;GO:0010038//response to metal ion	gi|1730560|sp|P53537.1|PHSH_VICFA/0/RecName: Full=Alpha-glucan phosphorylase, H isozyme; AltName: Full=Starch phosphorylase H
Medtr3g008820	561	1.73344	Up	5.24164e-47	plant invertase/pectin methylesterase inhibitor	K01051|1|1e-19|94.4|rcu:RCOM_0417480|pectinesterase [EC:3.1.1.11];K02355|2|1e-18|90.9|vvi:100257414|elongation factor G	-	GO:0004091//carboxylesterase activity;GO:0030234//enzyme regulator activity	-	gi|357455915|ref|XP_003598238.1|/3.08022e-96/21 kDa protein [Medicago truncatula]
Medtr3g008500	1167	1.56177	Up	0.000154219	trehalose-phosphate phosphatase	K01087|1|0.0|776|mtr:MTR_3g008500|trehalose 6-phosphate phosphatase [EC:3.1.3.12]	-	GO:0019203//carbohydrate phosphatase activity;GO:0019203//carbohydrate phosphatase activity;GO:0019203//carbohydrate phosphatase activity	GO:0005991//trehalose metabolic process;GO:0005991//trehalose metabolic process;GO:0005991//trehalose metabolic process	gi|357455863|ref|XP_003598212.1|/0/Trehalose-phosphate phosphatase [Medicago truncatula]
Medtr4g045667	1491	1.50004	Up	9.59073e-18	beta-amylase	K01177|1|4e-138|489|ppp:PHYPADRAFT_107034|beta-amylase [EC:3.2.1.2]	-	GO:0043167//ion binding;GO:0016160//amylase activity	GO:0005976//polysaccharide metabolic process	gi|388490868|gb|AFK33500.1|/0/unknown [Medicago truncatula]
Medtr8g023150	1749	1.40043	Up	8.82546e-22	pectinesterase/pectinesterase inhibitor	K01051|1|3e-109|394|rcu:RCOM_1179070|pectinesterase [EC:3.1.1.11]	GO:0005618//cell wall;GO:0031090//organelle membrane	GO:0004091//carboxylesterase activity;GO:0004857//enzyme inhibitor activity	GO:0045229//external encapsulating structure organization;GO:0071555//cell wall organization	gi|357514321|ref|XP_003627449.1|/0/Pectinesterase [Medicago truncatula]
Medtr4g067310	996	1.32775	Up	1.55548e-09	pfkB family carbohydrate kinase	K00847|1|3e-173|605|gmx:100780082|fructokinase [EC:2.7.1.4]	GO:0016020//membrane	GO:0004396//hexokinase activity;GO:0032559	GO:0019321//pentose metabolic process;GO:0006796//phosphate-containing compound metabolic process	gi|356538893|ref|XP_003537935.1|/3.38908e-172/PREDICTED: fructokinase-2-like [Glycine max]
Medtr3g008840	564	1.20851	Up	4.54732e-18	plant invertase/pectin methylesterase inhibitor	K01051|1|6e-20|95.1|rcu:RCOM_0417480|pectinesterase [EC:3.1.1.11];K02355|3|4e-18|89.0|vvi:100257414|elongation factor G	-	GO:0004091//carboxylesterase activity;GO:0030234//enzyme regulator activity	-	gi|357455917|ref|XP_003598239.1|/1.42516e-93/21 kDa protein [Medicago truncatula]
Medtr7g109390	2316	1.20078	Up	0.000101147	alpha-L-arabinofuranosidase/beta-D-xylosidase	K05349|1|0.0|1534|mtr:MTR_7g109390|beta-glucosidase [EC:3.2.1.21]	GO:0005618//cell wall	GO:0015926//glucosidase activity	GO:0044238//primary metabolic process	gi|357511337|ref|XP_003625957.1|/0/Beta-xylosidase [Medicago truncatula]
Medtr7g108905	1674	1.16539	Up	3.43778e-38	pectinesterase/pectinesterase inhibitor	K01051|1|0.0|804|gmx:100802881|pectinesterase [EC:3.1.1.11]	GO:0030312//external encapsulating structure	GO:0030234//enzyme regulator activity;GO:0004091//carboxylesterase activity	GO:0071555//cell wall organization	gi|356570976|ref|XP_003553658.1|/0/PREDICTED: probable pectinesterase/pectinesterase inhibitor 39-like [Glycine max]
Medtr7g012950	1443	1.08115	Up	4.52347e-32	UDP-glucose 6-dehydrogenase family protein	K00012|1|0.0|964|mtr:MTR_7g012950|UDPglucose 6-dehydrogenase [EC:1.1.1.22]	GO:0044444//cytoplasmic part;GO:0043231//intracellular membrane-bounded organelle	GO:0000166//nucleotide binding;GO:0016616//oxidoreductase activity, acting on the CH-OH group of donors, NAD or NADP as acceptor	GO:0008152//metabolic process	gi|357502229|ref|XP_003621403.1|/0/UDP-glucose dehydrogenase [Medicago truncatula]
Medtr4g094715	1386	-3.50879	Down	9.42069e-39	pectin lyase superfamily protein	K01184|1|8e-100|362|rcu:RCOM_1063390|polygalacturonase [EC:3.2.1.15]	-	GO:0004553//hydrolase activity, hydrolyzing O-glycosyl compounds	GO:0044238//primary metabolic process;GO:0045229//external encapsulating structure organization	gi|356524988|ref|XP_003531109.1|/0/PREDICTED: polygalacturonase At1g48100-like [Glycine max]
Medtr1g015980	1680	-3.40939	Down	0.000285622	fructan exohydrolase	K01193|1|0.0|1132|mtr:MTR_1g015980|beta-fructofuranosidase [EC:3.2.1.26]	-	GO:0016798//hydrolase activity, acting on glycosyl bonds	-	gi|357437407|ref|XP_003588979.1|/0/Beta-fructofuranosidase, insoluble isoenzyme [Medicago truncatula]
Medtr2g020240	1532.56	-3.24201	Down	0	beta-amylase	K01177|1|4e-79|293|rcu:RCOM_0856140|beta-amylase [EC:3.2.1.2]	-	GO:0043167//ion binding;GO:0016160//amylase activity;GO:0043167//ion binding;GO:0016160//amylase activity	GO:0005976//polysaccharide metabolic process;GO:0005976//polysaccharide metabolic process	gi|357447457|ref|XP_003594004.1|/0/Beta-amylase [Medicago truncatula]
Medtr4g099110	1626	-3.02321	Down	0	beta-amylase	K01177|1|0.0|940|gmx:100818063|beta-amylase [EC:3.2.1.2]	GO:0009532//plastid stroma	GO:0016160//amylase activity;GO:0043167//ion binding	GO:0005982//starch metabolic process;GO:0006950//response to stress;GO:0000023//maltose metabolic process	gi|356511157|ref|XP_003524296.1|/0/PREDICTED: beta-amylase 3, chloroplastic-like [Glycine max]
Medtr1g019480	1209	-2.94278	Down	2.6355e-05	alpha amylase domain protein	K01176|1|2e-139|493|mtr:MTR_1g019440|alpha-amylase [EC:3.2.1.1]	-	GO:0004553//hydrolase activity, hydrolyzing O-glycosyl compounds;GO:0046872//metal ion binding	GO:0008152//metabolic process	gi|357437831|ref|XP_003589191.1|/0/Alpha amylase [Medicago truncatula]
Medtr1g015970	1656	-2.75489	Down	0.00023672	fructan exohydrolase	K01193|1|0.0|1119|mtr:MTR_1g015970|beta-fructofuranosidase [EC:3.2.1.26]	-	GO:0016798//hydrolase activity, acting on glycosyl bonds	GO:0008152//metabolic process	gi|357437405|ref|XP_003588978.1|/0/Beta-fructofuranosidase, insoluble isoenzyme [Medicago truncatula]
Medtr5g044990	1737	-2.58108	Down	5.23401e-07	pfkB family carbohydrate kinase	K00847|1|7e-45|180|vvi:100262010|fructokinase [EC:2.7.1.4]	GO:0043232;GO:0009570//chloroplast stroma	GO:0016301//kinase activity	-	gi|357487653|ref|XP_003614114.1|/0/Fructokinase-2 [Medicago truncatula]
Medtr8g065010	1566	-2.22275	Down	9.335e-55	polygalacturonase plant-like protein	K01184|1|2e-143|507|rcu:RCOM_1063390|polygalacturonase [EC:3.2.1.15]	-	GO:0004553//hydrolase activity, hydrolyzing O-glycosyl compounds	GO:0044238//primary metabolic process	gi|356526789|ref|XP_003531999.1|/0/PREDICTED: polygalacturonase At1g48100 isoform 1 [Glycine max]
Medtr8g104655	1626	-2.19345	Down	5.1348e-11	pectinesterase/pectinesterase inhibitor	K01051|1|9e-146|515|pop:POPTR_572081|pectinesterase [EC:3.1.1.11]	GO:0005618//cell wall	GO:0016788//hydrolase activity, acting on ester bonds	-	gi|357521203|ref|XP_003630890.1|/0/Pectinesterase [Medicago truncatula]
Medtr4g101630	1810.06	-1.78114	Down	8.57559e-156	soluble acid invertase FRUCT2	K01193|1|0.0|1064|mtr:MTR_4g101630|beta-fructofuranosidase [EC:3.2.1.26]	GO:0043231//intracellular membrane-bounded organelle;GO:0043231//intracellular membrane-bounded organelle	GO:0004558//alpha-glucosidase activity;GO:0004558//alpha-glucosidase activity	GO:0044238//primary metabolic process;GO:0044238//primary metabolic process	gi|357476945|ref|XP_003608758.1|/0/Acid beta-fructofuranosidase [Medicago truncatula]
Medtr2g032710	1392	-1.60688	Down	4.11504e-23	polygalacturonase plant-like protein	K01184|1|1e-91|335|rcu:RCOM_1063390|polygalacturonase [EC:3.2.1.15]	-	GO:0004553//hydrolase activity, hydrolyzing O-glycosyl compounds;GO:0004553//hydrolase activity, hydrolyzing O-glycosyl compounds	GO:0044238//primary metabolic process;GO:0044238//primary metabolic process	gi|357448715|ref|XP_003594633.1|/0/Polygalacturonase [Medicago truncatula]
Medtr6g088810	1140	-1.56671	Down	3.52716e-15	pectinesterase	K01051|1|0.0|649|gmx:100793314|pectinesterase [EC:3.1.1.11]	GO:0044424//intracellular part;GO:0030312//external encapsulating structure	GO:0004091//carboxylesterase activity	GO:0071555//cell wall organization	gi|356495321|ref|XP_003516527.1|/0/PREDICTED: probable pectinesterase 53-like [Glycine max]
Medtr8g104580	1503	-1.45423	Down	3.01381e-08	pectinesterase/pectinesterase inhibitor	K01051|1|3e-124|443|pop:POPTR_572081|pectinesterase [EC:3.1.1.11]	-	GO:0016787//hydrolase activity	-	gi|357521203|ref|XP_003630890.1|/0/Pectinesterase [Medicago truncatula]
Medtr1g029520	2052	-1.37479	Down	4.00785e-15	four ACT domain ACT domain protein which protein	K00688|1|2e-06|53.1|cre:CHLREDRAFT_137300|starch phosphorylase [EC:2.4.1.1]	GO:0044444//cytoplasmic part	GO:0031406//carboxylic acid binding	-	gi|356546978|ref|XP_003541896.1|/0/PREDICTED: uncharacterized protein LOC100797658 [Glycine max]
Medtr8g104645	1119	-1.35269	Down	2.03872e-05	pectinesterase	K01051|1|3e-130|462|pop:POPTR_572081|pectinesterase [EC:3.1.1.11]	GO:0030312//external encapsulating structure	GO:0030234//enzyme regulator activity;GO:0004091//carboxylesterase activity	GO:0071555//cell wall organization;GO:0045229//external encapsulating structure organization	gi|357521203|ref|XP_003630890.1|/4.02747e-172/Pectinesterase [Medicago truncatula]
Medtr4g131800	3090	-1.34303	Down	7.32052e-07	glucose 6-phosphate/phosphate translocator 1	K05350|1|0.0|846|gmx:100811526|beta-glucosidase [EC:3.2.1.21]	-	GO:0043167//ion binding;GO:0008422//beta-glucosidase activity	GO:0044238//primary metabolic process;GO:0009699//phenylpropanoid biosynthetic process	gi|357480227|ref|XP_003610399.1|/0/Glucose-6-phosphate/phosphate translocator [Medicago truncatula]
Medtr4g070430	1587	-1.32495	Down	1.24301e-06	glucose-1-phosphate adenylyltransferase family protein	K00975|1|0.0|959|mtr:MTR_4g070430|glucose-1-phosphate adenylyltransferase [EC:2.7.7.27]	GO:0009536//plastid;GO:0009536//plastid;GO:0009536//plastid;GO:0009536//plastid;GO:0009536//plastid	GO:0070566//adenylyltransferase activity;GO:0070566//adenylyltransferase activity;GO:0070566//adenylyltransferase activity;GO:0070566//adenylyltransferase activity;GO:0070566//adenylyltransferase activity	GO:0005977//glycogen metabolic process;GO:0005977//glycogen metabolic process;GO:0005977//glycogen metabolic process;GO:0005977//glycogen metabolic process;GO:0005977//glycogen metabolic process	gi|357473317|ref|XP_003606943.1|/0/Glucose-1-phosphate adenylyltransferase [Medicago truncatula]
Medtr2g089030	1773	-1.30145	Down	9.00407e-60	beta-amylase	K01177|1|2e-127|454|ppp:PHYPADRAFT_107034|beta-amylase [EC:3.2.1.2]	-	GO:0043167//ion binding;GO:0016160//amylase activity	GO:0005976//polysaccharide metabolic process	gi|357453535|ref|XP_003597045.1|/0/Beta-amylase [Medicago truncatula]
Medtr0618s0020	687	-1.2816	Down	2.8081e-05	pectinesterase	K01051|1|5e-95|345|pop:POPTR_572081|pectinesterase [EC:3.1.1.11]	GO:0030312//external encapsulating structure	GO:0030234//enzyme regulator activity;GO:0004091//carboxylesterase activity	GO:0071555//cell wall organization;GO:0045229//external encapsulating structure organization	gi|357521211|ref|XP_003630894.1|/3.66324e-133/Pectinesterase [Medicago truncatula]
Medtr7g078680	1452	-1.21828	Down	5.81896e-36	polygalacturonase/glycoside hydrolase family protein	K01184|1|4e-22|104|ath:AT5G17200|polygalacturonase [EC:3.2.1.15]	-	GO:0004553//hydrolase activity, hydrolyzing O-glycosyl compounds	GO:0044238//primary metabolic process;GO:0045229//external encapsulating structure organization	gi|357507519|ref|XP_003624048.1|/0/Polygalacturonase [Medicago truncatula]
Medtr8g102380	1146	-1.19607	Down	7.03274e-05	pectinesterase	K01051|1|0.0|664|mtr:MTR_8g102380|pectinesterase [EC:3.1.1.11]	GO:0044424//intracellular part;GO:0030312//external encapsulating structure;GO:0044424//intracellular part;GO:0030312//external encapsulating structure	GO:0004091//carboxylesterase activity;GO:0004091//carboxylesterase activity	GO:0071555//cell wall organization;GO:0071555//cell wall organization	gi|357520829|ref|XP_003630703.1|/0/Pectinesterase [Medicago truncatula]
Medtr7g108930	2430	-1.17232	Down	8.55911e-07	sucrose synthase	K00695|1|0.0|1489|gmx:100793371|sucrose synthase [EC:2.4.1.13]	-	GO:0035251//UDP-glucosyltransferase activity	GO:0005984//disaccharide metabolic process	gi|3915037|sp|O24301.1|SUS2_PEA/0/RecName: Full=Sucrose synthase 2; AltName: Full=Sucrose-UDP glucosyltransferase 2

## Sheet: Table S5
Supplementary Table S5 Differentially Expressed Genes（DEGs）of Nitrogen Metabolism and Nitrate Transporter in the Leaves of mtlux-1 Mutant Compared to Wild Type.
geneID	geneLength	log2 Ratio(LUX730A/R108A)	Up-Down-Regulation(LUX730A/R108A)	FDR	Description	KEGG Orthology	GO Component	GO Function	GO Process	Blast nr
Medtr5g045630	377.3	3.03865	Up	1.08094e-08	cytochrome b5-like heme/steroid-binding domain protein	K00360|1|5e-10|60.8|ppp:PHYPADRAFT_184973|nitrate reductase (NADH) [EC:1.7.1.1];K13076|2|4e-07|51.2|bdi:100826592|delta8-fatty-acid desaturase [EC:1.14.19.4]	GO:0009526//plastid envelope;GO:0009526//plastid envelope	GO:0005506//iron ion binding;GO:0008940//nitrate reductase activity;GO:0005506//iron ion binding	GO:0008152//metabolic process	gi|357487753|ref|XP_003614164.1|/4.50587e-59/Cytochrome b5 [Medicago truncatula]
Medtr3g073180	2709	1.43494	Up	4.84793e-06	nitrate reductase [NADH]-like protein	K00360|1|0.0|1015|ppp:PHYPADRAFT_184973|nitrate reductase (NADH) [EC:1.7.1.1];K00387|4|4e-109|394|olu:OSTLU_3554|sulfite oxidase [EC:1.8.3.1]	-	GO:0008940//nitrate reductase activity;GO:0005506//iron ion binding;GO:0050662//coenzyme binding	GO:0042126//nitrate metabolic process	gi|317135444|gb|ADV03138.1|/0/nitrate reductase 1 [Medicago truncatula]
Medtr5g071360	1747.25	-2.23838	Down	3.44065e-277	asparagine synthetase [glutamine-hydrolyzing] protein	K01953|1|0.0|1025|mtr:MTR_5g071360|asparagine synthase (glutamine-hydrolysing) [EC:6.3.5.4]	-	GO:0016884//carbon-nitrogen ligase activity, with glutamine as amido-N-donor;GO:0032559;GO:0016884//carbon-nitrogen ligase activity, with glutamine as amido-N-donor;GO:0032559	GO:0009064//glutamine family amino acid metabolic process;GO:0006528//asparagine metabolic process;GO:0009064//glutamine family amino acid metabolic process;GO:0006528//asparagine metabolic process	gi|357490847|ref|XP_003615711.1|/0/Asparagine synthetase [Medicago truncatula]
Medtr2g009500	909	-1.12105	Down	3.08989e-11	carbonic anhydrase family protein	K01673|1|2e-175|612|mtr:MTR_2g009500|carbonic anhydrase [EC:4.2.1.1]	GO:0009536//plastid	GO:0046914//transition metal ion binding;GO:0016836//hydro-lyase activity	-	gi|357445965|ref|XP_003593260.1|/2.40722e-174/Carbonic anhydrase [Medicago truncatula]
Medtr8g015510	1074.29	1.34815	Up	0.000198842	IAA-amino acid hydrolase ILR1-like protein	K14664|1|3e-128|456|vvi:100251400|IAA-amino acid hydrolase [EC:3.5.1.-]	-	GO:0016811//hydrolase activity, acting on carbon-nitrogen (but not peptide) bonds, in linear amides;GO:0016811//hydrolase activity, acting on carbon-nitrogen (but not peptide) bonds, in linear amides	-	gi|95106141|gb|ABF55222.1|/0/auxin conjugate hydrolase [Medicago truncatula]
Medtr8g069505	2176.34	-2.32032	Down	4.02e-71	copper amine oxidase, enzyme domain protein	K00276|1|0.0|1050|gmx:100783091|primary-amine oxidase [EC:1.4.3.21]	GO:0042579//microbody;GO:0042579//microbody;GO:0042579//microbody;GO:0042579//microbody;GO:0042579//microbody;GO:0042579//microbody;GO:0042579//microbody;GO:0042579//microbody;GO:0042579//microbody	GO:0046914//transition metal ion binding;GO:0016641//oxidoreductase activity, acting on the CH-NH2 group of donors, oxygen as acceptor;GO:0048037//cofactor binding;GO:0046914//transition metal ion binding;GO:0016641//oxidoreductase activity, acting on the CH-NH2 group of donors, oxygen as acceptor;GO:0048037//cofactor binding;GO:0046914//transition metal ion binding;GO:0016641//oxidoreductase act…	GO:0006807//nitrogen compound metabolic process;GO:0006807//nitrogen compound metabolic process;GO:0006807//nitrogen compound metabolic process;GO:0006807//nitrogen compound metabolic process;GO:0006807//nitrogen compound metabolic process;GO:0006807//nitrogen compound metabolic process;GO:0006807//nitrogen compound metabolic process;GO:0006807//nitrogen compound metabolic process;GO:0006807//nit…	gi|356566002|ref|XP_003551224.1|/0/PREDICTED: primary amine oxidase-like [Glycine max]
Medtr8g446910	1797	-1.62205	Down	0.000189182	CTP synthase-like protein	K01937|1|0.0|941|gmx:100799980|CTP synthase [EC:6.3.4.2]	GO:0044464//cell part	GO:0016879//ligase activity, forming carbon-nitrogen bonds	GO:0006220//pyrimidine nucleotide metabolic process;GO:0003006//developmental process involved in reproduction;GO:0010038//response to metal ion	gi|356556688|ref|XP_003546655.1|/0/PREDICTED: CTP synthase 1-like [Glycine max]
Medtr3g080500	2196	-1.48065	Down	2.01e-51	copper amine oxidase, enzyme domain protein	K00276|1|2e-75|281|cme:CMS002C|primary-amine oxidase [EC:1.4.3.21]	GO:0043231//intracellular membrane-bounded organelle	GO:0046914//transition metal ion binding;GO:0016641//oxidoreductase activity, acting on the CH-NH2 group of donors, oxygen as acceptor;GO:0048037//cofactor binding	GO:0006807//nitrogen compound metabolic process	gi|357462275|ref|XP_003601419.1|/0/Primary amine oxidase [Medicago truncatula]
Medtr2g035405	1384.83	-1.32102	Down	6.6e-117	allantoate amidohydrolase	K02083|1|2e-156|549|gmx:100819399|allantoate deiminase [EC:3.5.3.9]	GO:0043231//intracellular membrane-bounded organelle;GO:0043231//intracellular membrane-bounded organelle;GO:0043231//intracellular membrane-bounded organelle	GO:0016813//hydrolase activity, acting on carbon-nitrogen (but not peptide) bonds, in linear amidines;GO:0070011//peptidase activity, acting on L-amino acid peptides;GO:0016813//hydrolase activity, acting on carbon-nitrogen (but not peptide) bonds, in linear amidines;GO:0070011//peptidase activity, acting on L-amino acid peptides;GO:0016813//hydrolase activity, acting on carbon-nitrogen (but not …	GO:0019538//protein metabolic process;GO:0010135;GO:0019538//protein metabolic process;GO:0010135;GO:0019538//protein metabolic process;GO:0010135	gi|357449149|ref|XP_003594851.1|/0/Allantoate amidohydrolase [Medicago truncatula]
Medtr4g131840	1135.16	-1.24539	Down	1.86e-09	adenosine/AMP deaminase	K01488|1|0.0|668|mtr:MTR_4g131840|adenosine deaminase [EC:3.5.4.4]	-	GO:0016814//hydrolase activity, acting on carbon-nitrogen (but not peptide) bonds, in cyclic amidines;GO:0016814//hydrolase activity, acting on carbon-nitrogen (but not peptide) bonds, in cyclic amidines	GO:0009127//purine nucleoside monophosphate biosynthetic process;GO:0009127//purine nucleoside monophosphate biosynthetic process	gi|357480235|ref|XP_003610403.1|/0/Adenosine deaminase-like protein [Medicago truncatula]
Medtr5g012850	1026.98	-1.01917	Down	9.26e-17	formyltetrahydrofolate deformylase	K01433|1|2e-130|462|mtr:MTR_5g012850|formyltetrahydrofolate deformylase [EC:3.5.1.10]	GO:0043231//intracellular membrane-bounded organelle;GO:0043231//intracellular membrane-bounded organelle;GO:0043231//intracellular membrane-bounded organelle;GO:0043231//intracellular membrane-bounded organelle;GO:0043231//intracellular membrane-bounded organelle	GO:0016741;GO:0016811//hydrolase activity, acting on carbon-nitrogen (but not peptide) bonds, in linear amides;GO:0016741;GO:0016811//hydrolase activity, acting on carbon-nitrogen (but not peptide) bonds, in linear amides;GO:0016811//hydrolase activity, acting on carbon-nitrogen (but not peptide) bonds, in linear amides;GO:0016741;GO:0016741;GO:0016811//hydrolase activity, acting on carbon-nitrog…	GO:0006188//IMP biosynthetic process;GO:0006760//folic acid-containing compound metabolic process;GO:0043094;GO:0006188//IMP biosynthetic process;GO:0006730//one-carbon metabolic process;GO:0006760//folic acid-containing compound metabolic process;GO:0043094;GO:0043094;GO:0006188//IMP biosynthetic process;GO:0006760//folic acid-containing compound metabolic process;GO:0006188//IMP biosynthetic pr…	gi|357482089|ref|XP_003611330.1|/2.16011e-129/Methionyl-tRNA formyltransferase [Medicago truncatula]
Medtr8g015510	1074.29	1.34815	Up	0.000198842	IAA-amino acid hydrolase ILR1-like protein	K14664|1|3e-128|456|vvi:100251400|IAA-amino acid hydrolase [EC:3.5.1.-]	-	GO:0016811//hydrolase activity, acting on carbon-nitrogen (but not peptide) bonds, in linear amides;GO:0016811//hydrolase activity, acting on carbon-nitrogen (but not peptide) bonds, in linear amides	-	gi|95106141|gb|ABF55222.1|/0/auxin conjugate hydrolase [Medicago truncatula]
Medtr1g111510	1791	10.3987	Up	6.06e-05	MFS transporter	-	-	-	GO:0006810//transport	gi|358346702|ref|XP_003637404.1|/0/Nitrate and chloride transporter [Medicago truncatula]
Medtr0236s0050	1512	3.40599	Up	0.00016811	peptide/nitrate transporter	K14638|1|6e-62|236|gmx:100816253|solute carrier family 15 (peptide/histidine transporter), member 3/4	GO:0016020//membrane	-	-	gi|124359628|gb|ABD32293.2|/0/TGF-beta receptor, type I/II extracellular region [Medicago truncatula]
Medtr2g101640	1899	1.83192	Up	6.87e-18	peptide/nitrate transporter plant	K14638|1|4e-89|327|gmx:100816253|solute carrier family 15 (peptide/histidine transporter), member 3/4	GO:0016020//membrane	-	GO:0015833//peptide transport	gi|124359628|gb|ABD32293.2|/0/TGF-beta receptor, type I/II extracellular region [Medicago truncatula]
Medtr7g111260	1758	1.03649	Up	1.88e-05	peptide/nitrate transporter	K14638|1|1e-107|389|smo:SELMODRAFT_448814|solute carrier family 15 (peptide/histidine transporter), member 3/4	GO:0044464//cell part	GO:0004871//signal transducer activity	GO:0015833//peptide transport	gi|357511669|ref|XP_003626123.1|/0/Peptide transporter PTR1 [Medicago truncatula]
Medtr8g038880	1719	1.00541	Up	1.26e-06	peptide/nitrate transporter plant	K14638|1|2e-114|411|pop:POPTR_804521|solute carrier family 15 (peptide/histidine transporter), member 3/4	GO:0016020//membrane	-	GO:0006810//transport	gi|357515089|ref|XP_003627833.1|/0/Peptide transporter PTR1 [Medicago truncatula]
Medtr4g107670	1737	-5.16993	Down	2.95e-09	peptide/nitrate transporter	K14638|1|2e-91|335|smo:SELMODRAFT_448814|solute carrier family 15 (peptide/histidine transporter), member 3/4	GO:0016020//membrane	GO:0046872//metal ion binding	GO:0051707//response to other organism	gi|356513553|ref|XP_003525477.1|/0/PREDICTED: nitrate transporter 1.2-like [Glycine max]
Medtr4g098800	1974	-3.44478	Down	1.39e-07	peptide transporter	K14638|1|1e-138|491|ppp:PHYPADRAFT_134814|solute carrier family 15 (peptide/histidine transporter), member 3/4	GO:0016020//membrane;GO:0016020//membrane	GO:0015103//inorganic anion transmembrane transporter activity;GO:0015103//inorganic anion transmembrane transporter activity	GO:0010035//response to inorganic substance;GO:0042126//nitrate metabolic process;GO:0015833//peptide transport;GO:0015698//inorganic anion transport;GO:0010035//response to inorganic substance;GO:0042126//nitrate metabolic process;GO:0015833//peptide transport;GO:0015698//inorganic anion transport	gi|357476727|ref|XP_003608649.1|/0/Peptide transporter PTR1 [Medicago truncatula]
Medtr7g088790	1842	-2.62045	Down	1.21e-10	peptide/nitrate transporter	K14638|1|3e-115|414|mtr:MTR_4g015080|solute carrier family 15 (peptide/histidine transporter), member 3/4	GO:0044464//cell part	-	GO:0015833//peptide transport	gi|357509215|ref|XP_003624896.1|/0/Peptide transporter PTR5 [Medicago truncatula]
Medtr4g033315	1680	-2.38247	Down	5.6e-05	proton-dependent oligopeptide transport family protein	K14638|1|2e-118|424|smo:SELMODRAFT_448814|solute carrier family 15 (peptide/histidine transporter), member 3/4	GO:0016020//membrane	-	GO:0015833//peptide transport	gi|356543142|ref|XP_003540022.1|/0/PREDICTED: probable peptide/nitrate transporter At1g22540-like isoform 1 [Glycine max]
Medtr5g012290	1776	-2.1332	Down	5.42e-97	peptide/nitrate transporter	K14638|1|1e-124|445|smo:SELMODRAFT_135536|solute carrier family 15 (peptide/histidine transporter), member 3/4	GO:0031224//intrinsic to membrane	-	GO:0015833//peptide transport	gi|357482001|ref|XP_003611286.1|/0/Nitrate transporter [Medicago truncatula]
Medtr2g093160	1650	-1.96864	Down	7.38e-05	nitrate excretion transporter 1	K14638|1|5e-72|270|gmx:100816253|solute carrier family 15 (peptide/histidine transporter), member 3/4	-	-	-	gi|357453727|ref|XP_003597144.1|/0/Nitrate/chlorate transporter [Medicago truncatula]
Medtr5g055000	1755	-1.89926	Down	1.4e-229	peptide/nitrate transporter	K14638|1|4e-133|473|ppp:PHYPADRAFT_134814|solute carrier family 15 (peptide/histidine transporter), member 3/4	GO:0044464//cell part	-	GO:0015833//peptide transport	gi|357488469|ref|XP_003614522.1|/0/Peptide transporter PTR [Medicago truncatula]
Medtr5g085850	1767	-1.60505	Down	7.12e-213	peptide/nitrate transporter	K14638|1|2e-114|411|ppp:PHYPADRAFT_189464|solute carrier family 15 (peptide/histidine transporter), member 3/4	GO:0044464//cell part	-	GO:0015833//peptide transport	gi|357493285|ref|XP_003616931.1|/0/Nitrate transporter [Medicago truncatula]
Medtr4g107580	1806	-1.24636	Down	3.15e-05	peptide/nitrate transporter	K14638|1|6e-112|403|pop:POPTR_804521|solute carrier family 15 (peptide/histidine transporter), member 3/4	GO:0044464//cell part	-	GO:0015833//peptide transport	gi|357477387|ref|XP_003608979.1|/0/Nitrate transporter NRT1-2 [Medicago truncatula]
Medtr4g114340	1734	-1.1162	Down	3.77e-46	peptide/nitrate transporter	K14638|1|3e-120|430|ppp:PHYPADRAFT_189464|solute carrier family 15 (peptide/histidine transporter), member 3/4	GO:0031224//intrinsic to membrane	-	GO:0006950//response to stress;GO:0015833//peptide transport;GO:0009719	gi|357478055|ref|XP_003609313.1|/0/Nitrate transporter [Medicago truncatula]
Medtr4g101380	1782	-1.07994	Down	3.79e-07	peptide/nitrate transporter	K14638|1|1e-120|431|ppp:PHYPADRAFT_189464|solute carrier family 15 (peptide/histidine transporter), member 3/4	GO:0031224//intrinsic to membrane	-	GO:0015833//peptide transport	gi|357476933|ref|XP_003608752.1|/0/Nitrate transporter [Medicago truncatula]
Medtr3g072300	1770	-1.06374	Down	1.35e-29	peptide/nitrate transporter	K14638|1|2e-140|498|smo:SELMODRAFT_97812|solute carrier family 15 (peptide/histidine transporter), member 3/4	GO:0044464//cell part	-	GO:0051707//response to other organism;GO:0015833//peptide transport	gi|357461509|ref|XP_003601036.1|/0/Peptide transporter PTR3-A [Medicago truncatula]

## Sheet: Table S6
Supplementary Table S6 Differentially Expressed Genes（DEGs）of Amino Acid Metabolism in the Leaves of mtlux-1 Mutant Compared to Wild Type.
geneID	geneLength	log2 Ratio(LUX730A/R108A)	Up-Down-Regulation(LUX730A/R108A)	FDR	Description	KEGG Orthology	GO Component	GO Function	GO Process	Blast nr
Medtr5g031860	1425	2.34865	Up	1.34e-07	UDP-glucosyltransferase family protein	K13493|1|6e-53|206|ath:AT5G05860|cytokinin-N-glucosyltransferase [EC:2.4.1.-];K13030|2|1e-48|192|sbi:SORBI_01g001220|cyanohydrin beta-glucosyltransferase [EC:2.4.1.85];K13691|3|6e-48|190|mtr:MTR_8g088560|pathogen-inducible salicylic acid glucosyltransferase [EC:2.4.1.-];K13692|4|7e-48|189|rcu:RCOM_1154190|UDP-glucose:(indol-3-yl)acetate beta-D-glucosyltransferase [EC:2.4.1.121]	-	-	-	gi|357485481|ref|XP_003613028.1|/0/Cis-zeatin O-glucosyltransferase [Medicago truncatula]
Medtr5g031840	1401	1.89878	Up	0.000194383	UDP-glucosyltransferase family protein	K13493|1|2e-56|218|ath:AT5G05860|cytokinin-N-glucosyltransferase [EC:2.4.1.-];K13030|2|1e-54|212|sbi:SORBI_01g001220|cyanohydrin beta-glucosyltransferase [EC:2.4.1.85];K13691|4|7e-54|209|mtr:MTR_8g088560|pathogen-inducible salicylic acid glucosyltransferase [EC:2.4.1.-];K13692|5|2e-50|198|rcu:RCOM_1154190|UDP-glucose:(indol-3-yl)acetate beta-D-glucosyltransferase [EC:2.4.1.121]	-	GO:0016740//transferase activity	-	gi|357485477|ref|XP_003613026.1|/0/UDP-glucuronosyltransferase 1-6 [Medicago truncatula]
Medtr7g109390	2316	1.20078	Up	0.000101147	alpha-L-arabinofuranosidase/beta-D-xylosidase	K05349|1|0.0|1534|mtr:MTR_7g109390|beta-glucosidase [EC:3.2.1.21]	GO:0005618//cell wall	GO:0015926//glucosidase activity	GO:0044238//primary metabolic process	gi|357511337|ref|XP_003625957.1|/0/Beta-xylosidase [Medicago truncatula]
Medtr6g014190	882	1.08329	Up	3e-14	UDP-glucosyltransferase family protein	K13030|1|1e-68|258|sbi:SORBI_01g001220|cyanohydrin beta-glucosyltransferase [EC:2.4.1.85];K13692|2|1e-51|201|vvi:100252177|UDP-glucose:(indol-3-yl)acetate beta-D-glucosyltransferase [EC:2.4.1.121];K13493|3|3e-51|200|ath:AT5G05860|cytokinin-N-glucosyltransferase [EC:2.4.1.-]	-	GO:0016757//transferase activity, transferring glycosyl groups	-	gi|357496735|ref|XP_003618656.1|/1.53705e-162/UDP-glucuronosyltransferase [Medicago truncatula]
Medtr3g479470	1458	1.05784	Up	5.35e-12	UDP-glucosyltransferase family protein	K13030|1|6e-101|366|sbi:SORBI_01g001220|cyanohydrin beta-glucosyltransferase [EC:2.4.1.85];K13691|2|8e-53|206|gmx:100787483|pathogen-inducible salicylic acid glucosyltransferase [EC:2.4.1.-];K13692|3|1e-52|205|rcu:RCOM_1154190|UDP-glucose:(indol-3-yl)acetate beta-D-glucosyltransferase [EC:2.4.1.121];K13228|4|3e-52|204|zma:100274317|UDP-glucosyltransferase BX9 [EC:2.4.1.202]	-	GO:0016757//transferase activity, transferring glycosyl groups	-	gi|356577454|ref|XP_003556840.1|/0/PREDICTED: UDP-glycosyltransferase 85A2-like [Glycine max]
Medtr4g064987	1347	-2.57894	Down	2.08e-10	UDP-glucosyltransferase family protein	K13493|1|7e-77|286|ath:AT5G05870|cytokinin-N-glucosyltransferase [EC:2.4.1.-];K13228|3|4e-56|217|zma:100274317|UDP-glucosyltransferase BX9 [EC:2.4.1.202];K13227|4|2e-48|191|zma:100277344|UDP-glucosyltransferase BX8 [EC:2.4.1.202];K13030|5|1e-42|172|sbi:SORBI_01g001220|cyanohydrin beta-glucosyltransferase [EC:2.4.1.85]	-	GO:0016740//transferase activity;GO:0016740//transferase activity	-	gi|388500292|gb|AFK38212.1|/0/unknown [Medicago truncatula]
Medtr3g479610	957	-1.66991	Down	2.42e-12	UDP-glucosyltransferase family protein	K13030|1|6e-64|242|sbi:SORBI_01g001220|cyanohydrin beta-glucosyltransferase [EC:2.4.1.85];K13228|2|6e-45|179|zma:100274317|UDP-glucosyltransferase BX9 [EC:2.4.1.202];K13692|3|8e-42|169|rcu:RCOM_1154190|UDP-glucose:(indol-3-yl)acetate beta-D-glucosyltransferase [EC:2.4.1.121];K13691|4|7e-41|166|rcu:RCOM_0101360|pathogen-inducible salicylic acid glucosyltransferase [EC:2.4.1.-]	-	GO:0016758//transferase activity, transferring hexosyl groups	-	gi|357443907|ref|XP_003592231.1|/1.09166e-172/Cytokinin-O-glucosyltransferase [Medicago truncatula]
Medtr3g479620	519	-1.63454	Down	0.000257077	UDP-glucosyl transferase 85A5	K13030|1|3e-37|152|sbi:SORBI_01g001220|cyanohydrin beta-glucosyltransferase [EC:2.4.1.85];K13068|2|2e-15|79.7|aly:ARALYDRAFT_479675|sinapate 1-glucosyltransferase [EC:2.4.1.120];K13691|4|2e-13|73.2|rcu:RCOM_0606510|pathogen-inducible salicylic acid glucosyltransferase [EC:2.4.1.-];K13493|5|2e-13|73.2|ath:AT5G05870|cytokinin-N-glucosyltransferase [EC:2.4.1.-]	-	GO:0035251//UDP-glucosyltransferase activity	-	gi|388508058|gb|AFK42095.1|/2.43332e-99/unknown [Medicago truncatula]
Medtr0891s0010	888	-1.41303	Down	0.000217143	UDP-glucosyltransferase family protein	K13030|1|1e-56|218|sbi:SORBI_01g001220|cyanohydrin beta-glucosyltransferase [EC:2.4.1.85];K13228|2|6e-44|176|zma:100274317|UDP-glucosyltransferase BX9 [EC:2.4.1.202];K13692|3|5e-42|169|rcu:RCOM_1154190|UDP-glucose:(indol-3-yl)acetate beta-D-glucosyltransferase [EC:2.4.1.121];K13068|5|5e-40|162|ath:AT3G21560|sinapate 1-glucosyltransferase [EC:2.4.1.120]	-	GO:0016758//transferase activity, transferring hexosyl groups	-	gi|357443907|ref|XP_003592231.1|/7.77191e-138/Cytokinin-O-glucosyltransferase [Medicago truncatula]
Medtr3g079480	1485	-1.38154	Down	6.61e-21	UDP-glucosyltransferase family protein	K13030|1|3e-104|377|sbi:SORBI_01g001220|cyanohydrin beta-glucosyltransferase [EC:2.4.1.85];K13228|2|4e-61|234|zma:100274317|UDP-glucosyltransferase BX9 [EC:2.4.1.202];K13493|3|2e-58|224|ath:AT5G05860|cytokinin-N-glucosyltransferase [EC:2.4.1.-];K13691|4|5e-58|223|rcu:RCOM_0101360|pathogen-inducible salicylic acid glucosyltransferase [EC:2.4.1.-];K13068|5|4e-57|220|ath:AT3G21560|sinapate 1-glucosy…	-	GO:0016758//transferase activity, transferring hexosyl groups	-	gi|357443907|ref|XP_003592231.1|/0/Cytokinin-O-glucosyltransferase [Medicago truncatula]
Medtr4g131800	3090	-1.34303	Down	7.32e-07	glucose 6-phosphate/phosphate translocator 1	K05350|1|0.0|846|gmx:100811526|beta-glucosidase [EC:3.2.1.21]	-	GO:0043167//ion binding;GO:0008422//beta-glucosidase activity	GO:0044238//primary metabolic process;GO:0009699//phenylpropanoid biosynthetic process	gi|357480227|ref|XP_003610399.1|/0/Glucose-6-phosphate/phosphate translocator [Medicago truncatula]
